# Supplementary material for: Glycoprotein CD98 as a receptor for colitis-targeted delivery of nanoparticles
Source: Royal Society of Chemistry journal article supplement (doi:10.1039/c3tb21564d), 2014-01-01
Supplement: c3tb21564d.pdf [file c3tb21564d.pdf]

## Electronic Supplementary Information (ESI)

### Glycoprotein CD98 as a receptor for colitis-targeted delivery of nanoparticle

Bo Xiao,\*<sup>a</sup> Yang Yang,<sup>a</sup> Emilie Viennois,<sup>a,b</sup> Yuchen Zhang,<sup>a</sup> Saravanan Ayyadurai,<sup>a</sup> Mark Baker,<sup>a</sup> Hamed Laroui<sup>a</sup> and Didier Merlin<sup>a,b</sup>

Supplementary Table S1. Primers used in this study.

| Primer name | Sequence                        | Description                     |
|-------------|---------------------------------|---------------------------------|
| CD98-F      | 5'-GAGGACAGGCTTTTGATTGC-3'      | CD98 gene RT-PCR forward primer |
| CD98-R      | 5'-ATTCAGTACGCTCCCCAGTG-3'      | CD98 gene RT-PCR reverse primer |
| 36B4-F      | 5'-TCCAGGCTTTGGGCATCA-3'        | 36B4 gene RT-PCR forward primer |
| 36B4-R      | 5'-CTTTATCAGCTGCACATCACTCAGA-3' | 36B4 gene RT-PCR reverse primer |

Supplementary Table S2. The particle size, polydistribution index (PDI) and zeta-potential of nanoparticles using different concentration and ratio of stabilizers (PVA and bPEI). (n=3).

| NPs group NO. | PVA (%) | bPEI (%) | Particle Size (nm) | polydispersity Index (PDI) | Zeta-potential (mV) |
|---------------|---------|----------|--------------------|----------------------------|---------------------|
| 1             | 0.6     | –        | 524.6              | 0.225                      | -16.75              |
|               | 1.2     | –        | 388.3              | 0.005                      | -13.46              |
|               | 2       | –        | 295.1              | 0.005                      | -16.48              |
|               | 3       | –        | 386.2              | 0.005                      | -14.44              |
| 2             | 0.6     | 0.5      | 510.3              | 0.211                      | +45.80              |
|               | 1.2     | 0.5      | 384.3              | 0.119                      | +54.87              |
|               | 2       | 0.5      | 334.5              | 0.196                      | +55.55              |
|               | 3       | 0.5      | 290.6              | 0.084                      | +36.00              |
| 3             | 0.6     | 1        | 402.1              | 0.242                      | +47.37              |
|               | 1.2     | 1        | 338.2              | 0.035                      | +42.74              |
|               | 2       | 1        | 366.9              | 0.005                      | +45.75              |
|               | 3       | 1        | 333.9              | 0.011                      | +49.58              |
| 4             | 0.6     | 2        | 381.5              | 0.056                      | +45.80              |
|               | 1.2     | 2        | 314.9              | 0.005                      | +43.19              |
|               | 2       | 2        | 313.4              | 0.208                      | +57.00              |
|               | 3       | 2        | 340.8              | 0.005                      | +54.89              |

### Supplementary Fig. S1

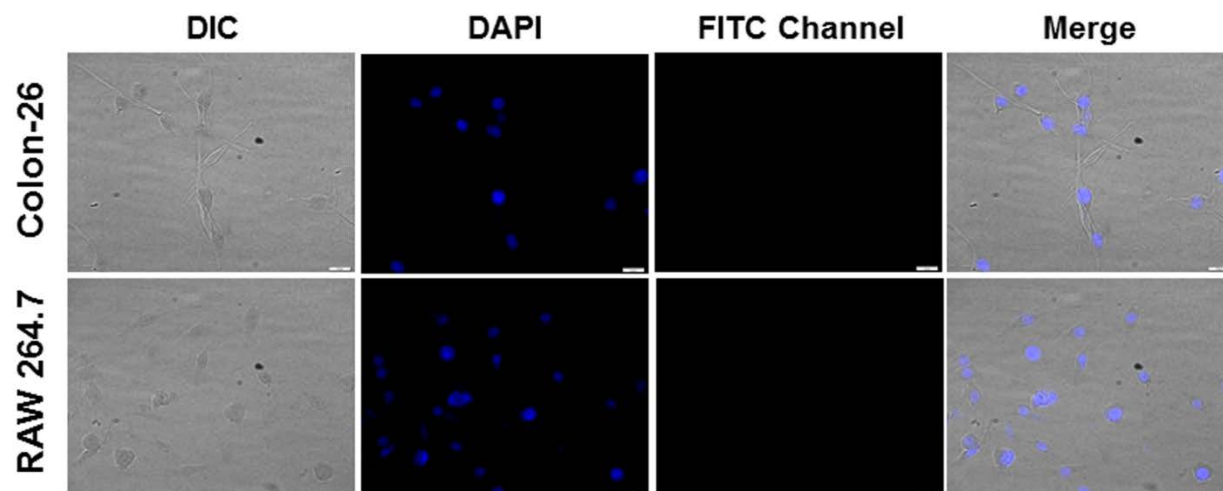

**Supplementary Fig. S1** Images of cellular uptake of free quantum dots (QDs) by Colon-26 and RAW 264.7 cells. Cells were treated with free QDs (1.25  $\mu\text{g}/\text{mL}$ ) for 6 h and processed for fluorescence staining. Fixed cells were stained with DAPI (purple) for visualization of nuclei. Scale bar represents 10  $\mu\text{m}$ .
